# Supplementary material for: HealthyDads.ca: What Do Men Want in a Website Designed to Promote Emotional Wellness and Healthy Behaviors During the Transition to Parenthood?
Source: PubMed Central journal article supplement (PMC5658653; doi:10.2196/jmir.7415), 2017-10-11
Supplement: jmir_v19i10e325_app1.pdf [file jmir_v19i10e325_app1.pdf]

Table 7. Barriers to Improving Emotional Wellness During the Perinatal Period by Psychological Distress Status

| <u>Help Seeking Barriers</u>                                                              | Distressed<br>(n= 57)<br>% | Not Distressed<br>(n=117)<br>% |
|-------------------------------------------------------------------------------------------|----------------------------|--------------------------------|
| No time to seek help/ assistance                                                          | 77.2                       | 73.5                           |
| Lack of resources available in the health care system                                     | 77.2                       | 70.1                           |
| Financial costs associated with services                                                  | 71.9                       | 65.8                           |
| Feeling that one should be able to do it on one's own                                     | 68.4                       | 63.2                           |
| Reluctance to talk to others about your moods or anxieties                                | 71.9*                      | 56.4                           |
| Reluctance from family or friends to talk about emotional aspects of pregnancy/postpartum | 63.2**                     | 41.9                           |
| Fear that others will judge you                                                           | 43.9                       | 33.6                           |

Percent rating  $\geq 3$  for each barrier statement (1=not a barrier; 5=very much a barrier).

Participants who had PHQ-2 scores greater than or equal to 2 or PSS-4 scores greater than or equal to 6 met criteria for distressed. \* $p < .05$ ; \*\* $p < .01$

Table 8. The Importance of Information Topics by Psychological Distress Status

|                                                                                   | Distressed<br>(n= 57)<br>% | Not Distressed<br>(n=117)<br>% |
|-----------------------------------------------------------------------------------|----------------------------|--------------------------------|
| How to settle my baby when s/he is fussy                                          | 87.7                       | 78.6                           |
| Information to increase my knowledge about how to look after my baby              | 82.5                       | 70.9                           |
| Information to help me learn how to improve our relationship after pregnancy      | 77.2                       | 68.4                           |
| Information to help me learn how to support my partner during pregnancy/labour    | 75.4                       | 66.7                           |
| Balancing work-family life                                                        | 71.9                       | 67.5                           |
| Ways to support my partner start and maintain breastfeeding                       | 66.7                       | 65.8                           |
| Information about my emotional adjustment following the baby's birth              | 61.4                       | 59.8                           |
| How to bond with my baby                                                          | 64.9                       | 53.8                           |
| Tools to help manage sleep problems                                               | 59.6                       | 56.4                           |
| Stress-management tools                                                           | 68.4*                      | 50.4                           |
| Information to help me find out about what is offered for dads locally in my area | 50.9                       | 59.8                           |
| How to play with my baby                                                          | 64.9                       | 50.4                           |
| Access to parenting resources                                                     | 52.6                       | 54.7                           |
| Information to increase confidence in my role as a dad                            | 54.1                       | 52.1                           |
| Strategies to improve my mood (or emotional well-being)                           | 68.4**                     | 44.4                           |
| Ways to stay motivated to exercise regularly after my partner has given birth     | 54.4                       | 47.9                           |
| Strategies to help me become or stay physically active                            | 57.9                       | 47.0                           |
| Information about my emotional adjustment during my partner's pregnancy           | 63.2*                      | 45.3                           |
| Information to help me learn how to cope with this huge change in my life         | 42.1                       | 47.0                           |
| Tools to decrease anxiety or fear related to childbirth                           | 50.9                       | 38.2                           |
| Strategies to help me eat healthy                                                 | 38.6                       | 44.4                           |
| Tests to measure my mood/stress levels                                            | 47.4                       | 33.3                           |
| Tips for getting help from my support system                                      | 42.1                       | 35.0                           |
| Access to psychosocial resources                                                  | 36.6*                      | 23.9                           |
| Information to help me learn more about my feelings about pregnancy               | 36.8*                      | 19.8                           |
| Chat rooms/social networking with other dads-to be or new dads                    | 29.8                       | 21.4                           |

Percent rating  $\geq 4$  for importance of information topics (1= not at all important; 5= very important); Participants who had PHQ-2 scores greater than or equal to 2 or PSS-4 scores greater than or equal to 6 met criteria for distressed. \* $p < .05$ ; \*\* $p < .01$

Table 9. User and Website Factors Reported as Important in Making a First-Visit to a Website for Expectant Fathers to Promote Their Mental Health and a Healthy Lifestyle by Psychological Distress Status

|                                                                                                 | Distressed<br>(n= 57)<br>% | Not Distressed<br>(n=117)<br>% |
|-------------------------------------------------------------------------------------------------|----------------------------|--------------------------------|
| <b>Whether the visitor .....</b>                                                                |                            |                                |
| - perceives the website as relevant for himself                                                 | 84.2                       | 88.0                           |
| - perceives the source (the organization that provides the intervention) of website as credible | 80.7                       | 81.9                           |
| - knows that the website is effective                                                           | 82.5                       | 79.5                           |
| - is willing to spend time on visiting the website                                              | 70.2                       | 82.9                           |
| - is motivated to visit a father-focused website                                                | 68.4                       | 78.6                           |
| - has access to the Internet at a private location (e.g., home, work)                           | 64.9                       | 76.9                           |
| - gets a positive recommendation about the website                                              | 68.4                       | 73.5                           |
| - wants to improve his mental health and/or lifestyle                                           | 63.2                       | 65.0                           |
| - has positive expectations of father-focused information delivered through the Internet        | 57.9                       | 65.8                           |
| - has sufficient skills to use the Internet                                                     | 32.1                       | 47.0                           |
| - is referred to the Internet intervention by a health professional (e.g., GP, nurse)           | 35.1                       | 40.2                           |
| - receives a reminder to visit the website                                                      | 31.6                       | 26.5                           |
| - receives an incentive for visiting the website                                                | 21.1                       | 23.9                           |
| <b>Whether the website.....</b>                                                                 |                            |                                |
| - has a navigation structure that appears to be easy to use at first sight                      | 77.2                       | 82.9                           |
| - is created by experts in parental well-being behavior change                                  | 75.4                       | 77.8                           |
| - is based on scientific knowledge                                                              | 75.4                       | 74.4                           |

Percent rating  $\geq 4$  for importance (1= not at all important; 5= extremely important); Participants who had PHQ-2 scores greater than or equal to 2 or PSS-4 scores greater than or equal to 6 met criteria for distressed.

Table 10. User and Website Factors Reported as Important in Prolonging a Visit to a Website for Expectant Fathers by Psychological Distress Status

|                                                                                                                | Distressed<br>(n= 57)<br>% | Not Distressed<br>(n=117)<br>% |
|----------------------------------------------------------------------------------------------------------------|----------------------------|--------------------------------|
| <b>Whether the visitor .....</b>                                                                               |                            |                                |
| - wants to improve his knowledge in relation to the topics of the website                                      | 70.2                       | 80.3                           |
| - experiences the use of the website as rewarding                                                              | 73.7                       | 74.4                           |
| - likes receiving (tailored) feedback on the answers he provided on questions                                  | 49.1                       | 47.9                           |
| - knows in advance how long it will take to go through the whole website                                       | 26.3                       | 26.5                           |
| - experiences the use of the website as challenging                                                            | 24.6                       | 18.8                           |
| <b>Whether the website.....</b>                                                                                |                            |                                |
| - provides information that is easy to understand                                                              | 89.5                       | 91.5                           |
| - can be used free of charge                                                                                   | 87.7                       | 90.6                           |
| - provides information that is perceived to be useful for dads help them adjust and engage in healthy behavior | 82.5                       | 85.5                           |
| - is attractive for the visitor to use                                                                         | 68.4                       | 71.8                           |
| - does not take much time to entirely complete                                                                 | 50.9                       | 54.7                           |
| - provides brief textual information (i.e., does not involve a lot of reading)                                 | 56.1                       | 47.0                           |
| - displays personal progress through the program (e.g., progress bar page numbers)                             | 49.1                       | 45.7                           |
| - provides testimonials of successes of other dads who used it                                                 | 36.8                       | 38.5                           |
| - has a brief registration procedure (e.g., the registration of login name and password)                       | 38.6                       | 35.0                           |
| - uses a short questionnaire for providing tailored feedback                                                   | 33.3                       | 36.8                           |
| - provides interactive features (e.g., tests, forums, games etc.)                                              | 38.6                       | 29.9                           |
| - uses a virtual guide to guide a visitor through the website                                                  | 22.8                       | 23.9                           |

Percent rating  $\geq 4$  for importance (1= not at all important; 5= extremely important); Participants who had PHQ-2 scores greater than or equal to 2 or PSS-4 scores greater than or equal to 6 met criteria for distressed.

Table 11. User and Website Factors Reported as Important to Re-visit a Website for Expectant Fathers by Psychological Distress Status

|                                                                                                    | Distressed<br>(n= 57)<br>% | Not Distressed<br>(n=117)<br>% |
|----------------------------------------------------------------------------------------------------|----------------------------|--------------------------------|
| <b>Whether the visitor .....</b>                                                                   |                            |                                |
| - is committed to re-visiting the website                                                          | 66.7                       | 62.4                           |
| - receives a reminder to re-visit the website                                                      | 21.1                       | 19.7                           |
| <b>Whether the website.....</b>                                                                    |                            |                                |
| - provides the possibility to post questions to a health professional                              | 76.4                       | 79.5                           |
| - provides new content on a regular basis                                                          | 77.2                       | 64.1                           |
| - uses an approach in which a new visit provides access to all modules or sections in the website  | 45.6                       | 49.6                           |
| - provides the possibility for a visitor to monitor his progress in changing a behavior            | 49.1                       | 44.4                           |
| - includes the option for the visitor to communicate with others (e.g., chat rooms, blogs, forums) | 31.6                       | 29.9                           |
| - uses a modular approach in which a new visit provides access to the next module or section       | 26.3                       | 17.9                           |

Percent rating  $\geq 4$  for importance (1= not at all important; 5= extremely important); Participants who had PHQ-2 scores greater than or equal to 2 or PSS-4 scores greater than or equal to 6 met criteria for distressed.
